# Supplementary material
Source: PubMed Central journal article supplement (PMC3137096)
Supplement: supp_M111.233601_Supplemental_data_article7058.pdf [file supp_M111.233601_Supplemental_data_article7058.pdf]

## SUPPLEMENTAL DATA

### SUPPLEMENTAL FIGURE LEGENDS

**Supplemental Figure S1. *H. pylori* binds to synthetic Le<sup>b</sup> in a BabA-dependent manner.**

*H. pylori* adhesion to immobilized Le<sup>b</sup> on a microtiter plate was analyzed using an *in vitro* adhesion assay. The results represent the average of three separate experiments (each  $n = 3$ ). Data are presented as the means  $\pm$  SD (*error bars*).

**Supplemental Figure S2. Establishment of cells stably expressing the ecotropic receptor.**

MDCK or CHO cells stably expressing the murine ecotropic retrovirus receptor plasmid (MDCK/EcoR or CHO/EcoR) were infected with control (Control virus) or GFP retrovirus (GFP virus). After 5 days of infection, almost all of the cells infected with the GFP virus expressed GFP. *Scale bar*, 20  $\mu$ m.

**Supplemental Figure S3. Establishment of MEF cells expressing Le<sup>b</sup>.**

MEF cells stably expressing FUT1 and FUT3 (MEF/pIRES-FUT1-FUT3) were transduced with retroviruses expressing b3Gal-T5 (B3GALT5) or the control virus alone (Control virus). After 5 days of infection, the cells were fixed and stained with an anti-Le<sup>b</sup> antibody (green) and rhodamine-labeled phalloidin (F-actin, red). *Scale bar*, 20  $\mu$ m.

**Supplemental Figure S4. Binding of *H. pylori* to Le<sup>b</sup>-expressing NIH3T3 cells.**

NIH3T3 cells were transduced with retroviruses expressing b3Gal-T5 (B3GALT5), FucT-I (FUT1), and FucT-III (FUT3), or the control virus alone (Control virus). After selecting with G418, the cells were infected with GFP-expressing ATCC 43579 *H. pylori* for 24 h at an MOI of 100. After fixation, the cells were stained with an anti-Le<sup>b</sup> antibody (red). *Scale bar*, 20  $\mu$ m.

**Supplemental Figure S5. Binding of *H. pylori* to Le<sup>b</sup>-expressing CHO cells.**

CHO cells were either left untreated (-) or transduced with retroviruses expressing b3Gal-T5 (B3GALT5), FucT-I (FUT1), and FucT-III (FUT3), or the control virus alone (Control virus). After selecting with G418, the cells were infected with GFP-expressing ATCC 43579 *H. pylori* for 24 h at an MOI of 100. After fixation, the cells were stained with an anti-Le<sup>b</sup> antibody (red). *Scale bar*, 20  $\mu$ m.

**Supplemental Figure S6. *H. pylori* binds to MDCK/Le<sup>b</sup> but not MDCK/pIRES cells.**

MDCK/Le<sup>b</sup> or MDCK/pIRES cells were infected with GFP-expressing ATCC 43579 *H. pylori* for 24 h at an MOI of 100. After fixation, the cells were stained with an anti-Le<sup>b</sup> antibody (red). *Scale bar*, 20  $\mu$ m.

**Supplemental Figure S7. *H. pylori* induces TFSS-dependent transcriptional activation in AGS cells in a BabA-independent manner.**

AGS cells transfected with pNF- $\kappa$ B-luc (NF- $\kappa$ B), pNFAT (NFAT), pAP1-luc (AP-1) and pSRE-luc (SRE) vectors were infected with *H. pylori* for 5 h. The lysates were measured using the luciferase assay. The luciferase activity was calculated as the average fold induction compared to the control from at least three independent experiments. Data are presented as the means  $\pm$  SD (*error bars*).

**Supplemental Figure S8. *H. pylori* induces TFSS-dependent morphological changes in AGS cells in a BabA-independent manner.**

AGS cells were infected with or without (-) the indicated *H. pylori* for 5 h at an MOI of 50. After fixation, the cells were stained with an anti-pY-CagA antibody (green), rhodamine-labeled phalloidin (red) and DAPI (DNA, blue). *Scale bar*, 20  $\mu\text{m}$ .

**Supplemental Table 1. *H. pylori* strains used in this study.**

| Parental strain | In text/figures as: | Relevant characteristics | Reference           |
|-----------------|---------------------|--------------------------|---------------------|
| ATCC 43504      | WT                  |                          | (23)                |
|                 | $\Delta babA$       | $\Delta babA::aph3$      | This study          |
|                 | $\Delta virB7$      | $\Delta virB7::aph3$     | (23)                |
| NCTC 11637      | WT                  |                          | (20)                |
|                 | $\Delta babA$       | $\Delta babA::aph3$      | This study          |
|                 | $\Delta virB7$      | $\Delta virB7::aph3$     | (20)                |
| J99             | WT                  |                          | (5)                 |
|                 | $\Delta babA$       | $\Delta babA::aph3$      | (5)                 |
| ATCC 43579      | WT                  |                          | (20)                |
|                 | GFP                 | pHel3-GFP                | This study and (20) |

**Supplemental Table 2. Oligonucleotides used in this study.**

| Purpose                                                     | ID            | Sequence (5' to 3')                                                                 |
|-------------------------------------------------------------|---------------|-------------------------------------------------------------------------------------|
| J99 BabA cloning forward                                    | BabA-F        | CGGTCGACATGAAAAACACATCCTTTCATTAA<br>CTTTAGGATCGC                                    |
| J99 BabA cloning (C-terminal<br>FLAG tag) reverse           | BabA-R        | CGGGGTACCTCACTTGTTCATCGTCGTCCTTGTAG<br>TCCGCGGATCCATAAGCGAACACGTAATTCAA<br>TACACGCT |
| FUT3 cloning forward                                        | FUT3-F        | CGAGATCTATGGATCCCCTGGGTGCAGC                                                        |
| FUT3 (C-terminal Myc tag)<br>cloning reverse                | FUT3-R        | CCGCTCGAGTCACAGATCCTCTTCTGAGATGAG<br>TTTTTGTTTCGGTGAACCAAGCCGCTATGCTGC              |
| FUT1 cloning forward                                        | FUT1-F        | CGGGATCCATGTGGCTCCGGAGCCATCG                                                        |
| FUT1 cloning (C-terminal<br>FLAG tag) reverse               | FUT1-R        | CCGCTCGAGTCACTTGTTCATCGTCGTCCTTGTAG<br>TCAGGCTTAGCCAATGTCCAGAG                      |
| B3GALT5 cloning forward                                     | B3GAL<br>T5-F | CGGGATCCATGGCTTCCCGAAGATGAG                                                         |
| B3GALT5 cloning (C-terminal<br>HA tag) reverse              | B3GAL<br>T5-R | CCGCTCGAGTCAAGCATAATCAGGAACATCATA<br>CGGATAACCCATGACAGGCGGACAATCTTC                 |
| GST cloning forward                                         | GST-F         | CCGATTAATATGTCCCCTATACTAGGTTATTG                                                    |
| GST cloning reverse with<br>PreScission-recognition site    | GST-R         | GGAATTCCATATGGGGCCCCTGGAACAGA                                                       |
| <i>H. pylori</i> 16S ribosomal RNA<br>real-time PCR forward | Hp<br>16S-F   | CAACATGGCTGATTTGCG                                                                  |
| <i>H. pylori</i> 16S ribosomal RNA<br>real-time PCR reverse | Hp<br>16S-R   | ACACCTCTCAGTTCGGA                                                                   |
| <i>Canis familiaris</i> CCL5<br>real-time PCR forward       | CCL5-F        | TGCTTTGCCTACATTTCCGGCCGA                                                            |
| <i>Canis familiaris</i> CCL5<br>real-time PCR reverse       | CCL5-R        | AAAGACGACTGCTGGCATGGAGCA                                                            |
| <i>Canis familiaris</i> IL8 real-time<br>PCR forward        | IL8-F         | TGGCTGTTGCTCTCTTGGCAGCTT                                                            |
| <i>Canis familiaris</i> IL8 real-time<br>PCR reverse        | IL8-R         | TGGGATGGAAAGGTGTGGAGTGTGT                                                           |
| <i>Canis familiaris</i> CDX2<br>real-time PCR forward       | CDX2-F        | ACATCACCATCCGGAGGAAAGCTGA                                                           |
| <i>Canis familiaris</i> CDX2<br>real-time PCR reverse       | CDX2-<br>R    | TGCTGCTGCTGCTGCAACTTCT                                                              |
| <i>Canis familiaris</i> MUC2<br>real-time PCR forward       | MUC2-<br>F    | TGGAGGCGAGCATTGGTGTTCATCA                                                           |
| <i>Canis familiaris</i> MUC2<br>real-time PCR reverse       | MUC2-<br>R    | AACGCTGGTCAAAGTTGCCGCA                                                              |
| <i>Canis familiaris</i> GAPDH<br>real-time PCR forward      | GAPDH<br>-F   | ACCAGGGCTGCTTTTAACTCTGGCA                                                           |
| <i>Canis familiaris</i> GAPDH<br>real-time PCR reverse      | GAPDH<br>-R   | TGACTGTGCCGTGGAATTTGCCGT                                                            |

|                                                                            |                 |                       |
|----------------------------------------------------------------------------|-----------------|-----------------------|
| <i>Meriones unguiculatus</i> CXCL1<br>real-time PCR forward                | CXCL1-<br>F     | TCACCTTCAAGCTCTGGATGC |
| <i>Meriones unguiculatus</i> CXCL1<br>real-time PCR reverse                | CXCL1-<br>R     | GCTCCAGTCGCCAACGAG    |
| <i>Meriones unguiculatus</i> 18S<br>ribosomal RNA real-time PCR<br>forward | gerbil<br>18S-F | GGCTACCACATCCAAGGAAGG |
| <i>Meriones unguiculatus</i> 18S<br>ribosomal RNA real-time PCR<br>reverse | gerbil<br>18S-R | AGGGCCTCGAAAGAGTCCTG  |

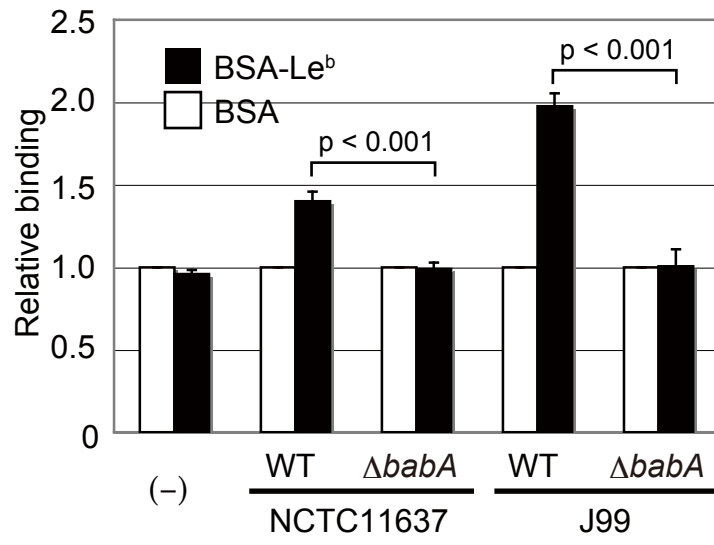

Figure S1

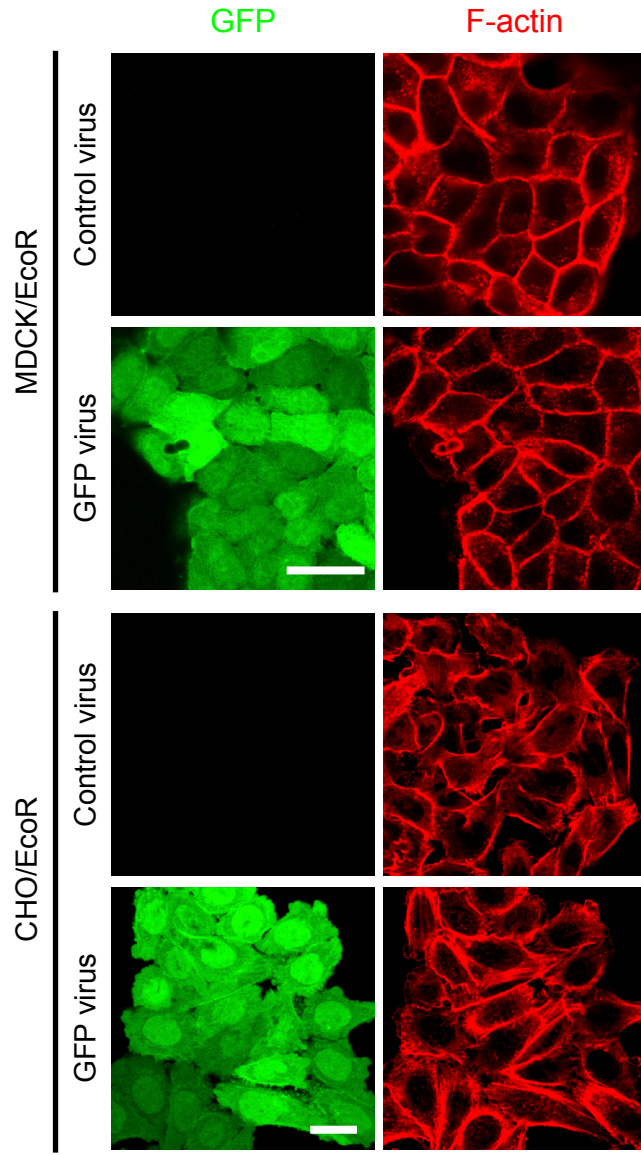

Figure S2

MEF/piRES-FUT1-FUT3

F-actin

Le<sup>b</sup>

Le<sup>b</sup> / F-actin

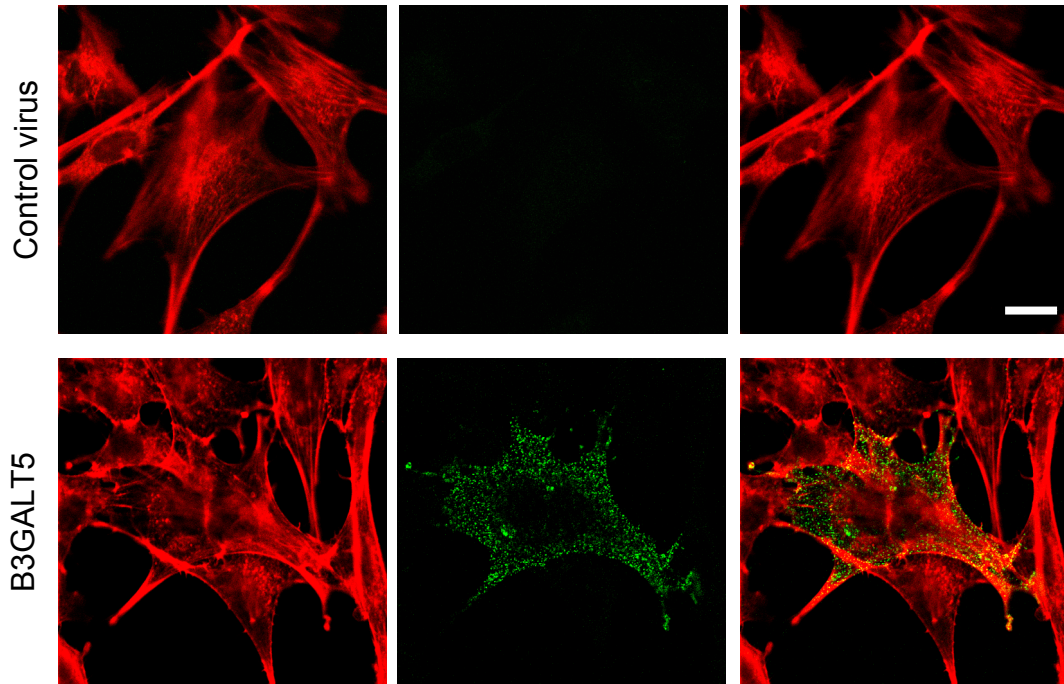

Figure S3



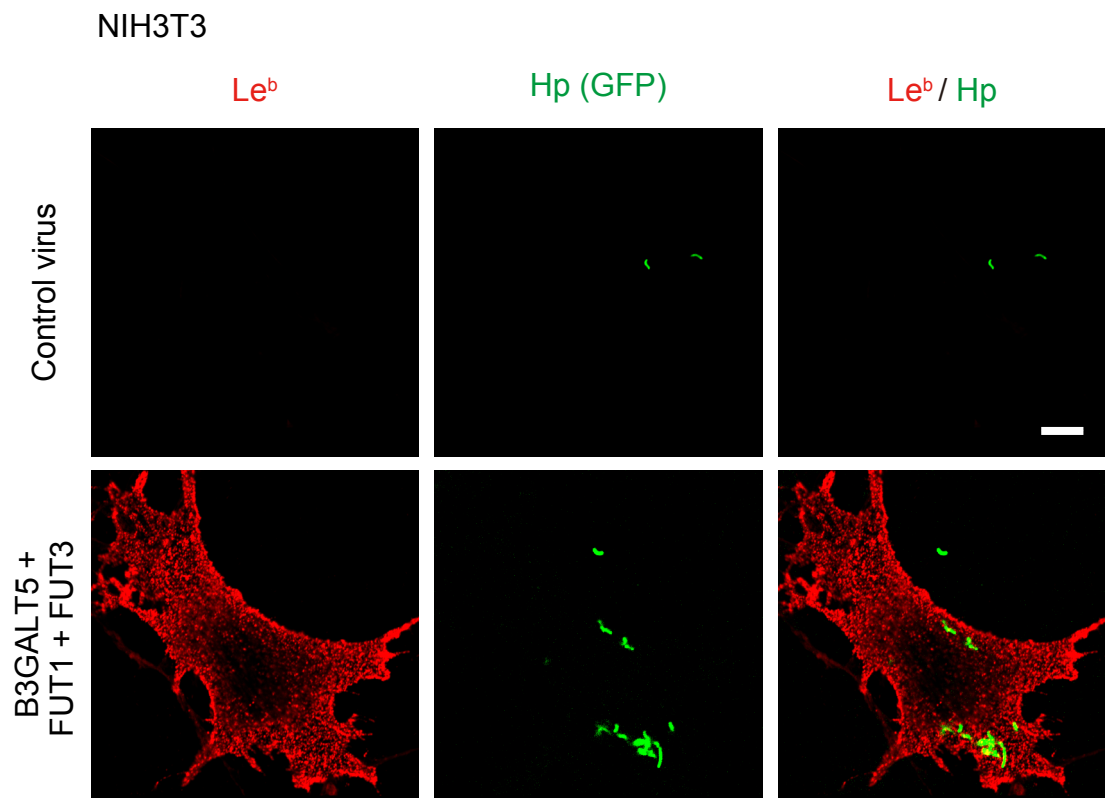

Figure S4

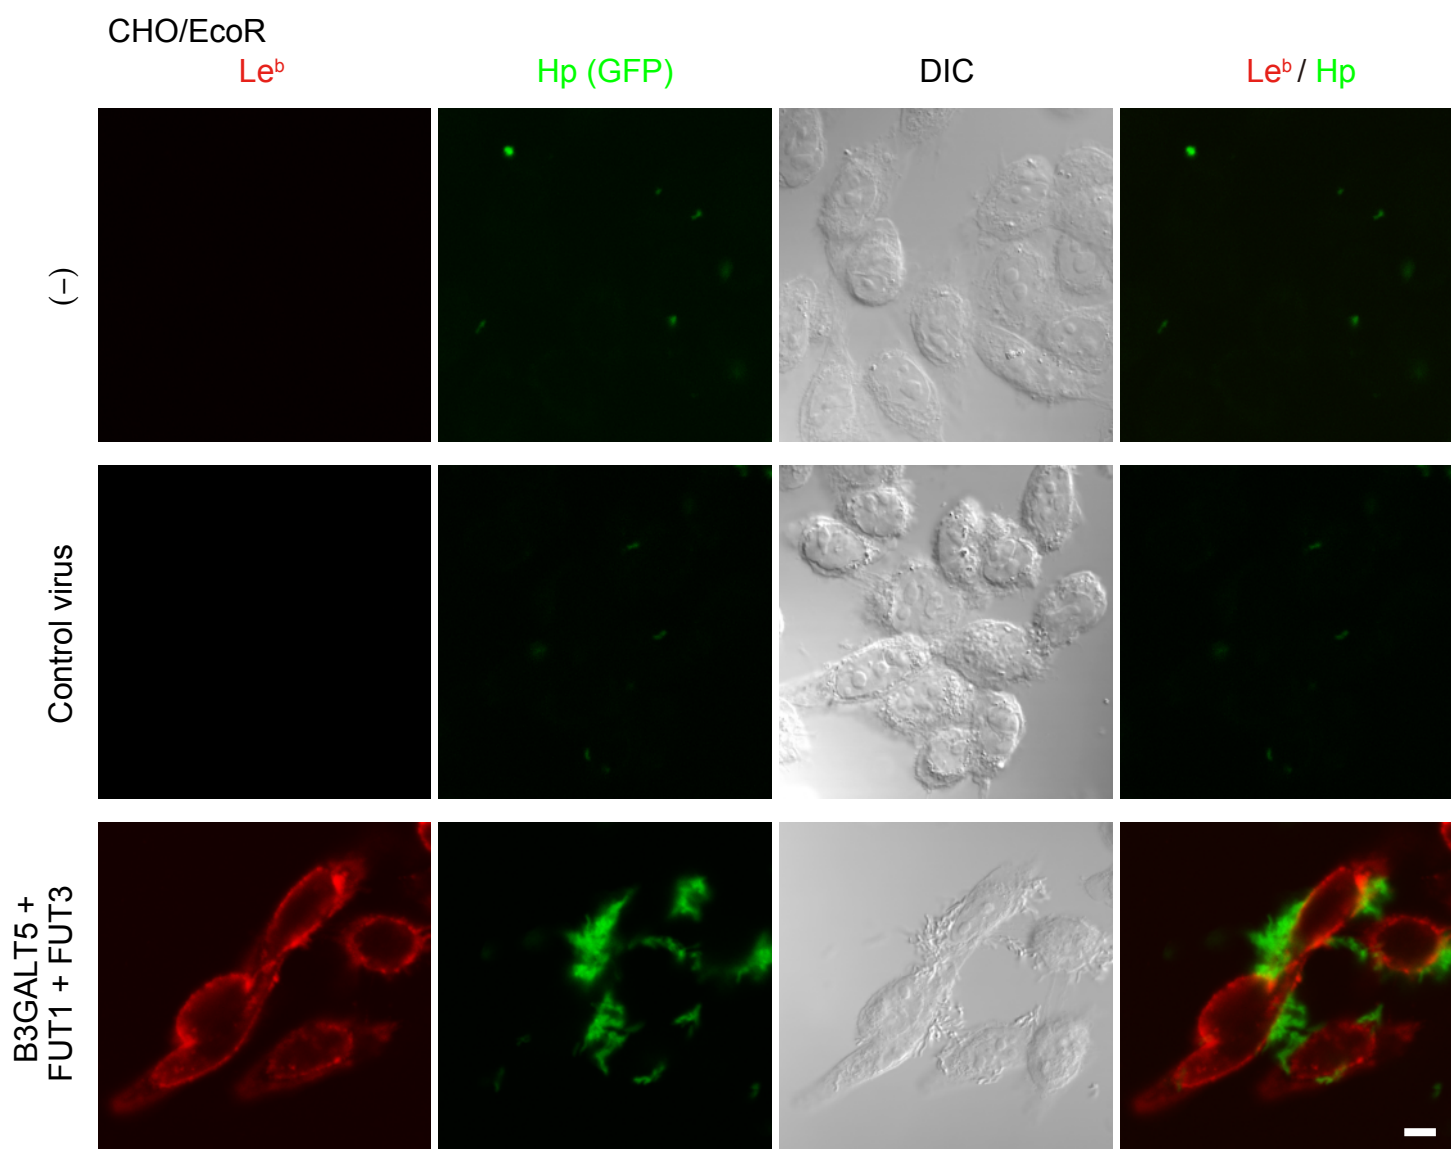

Figure S5

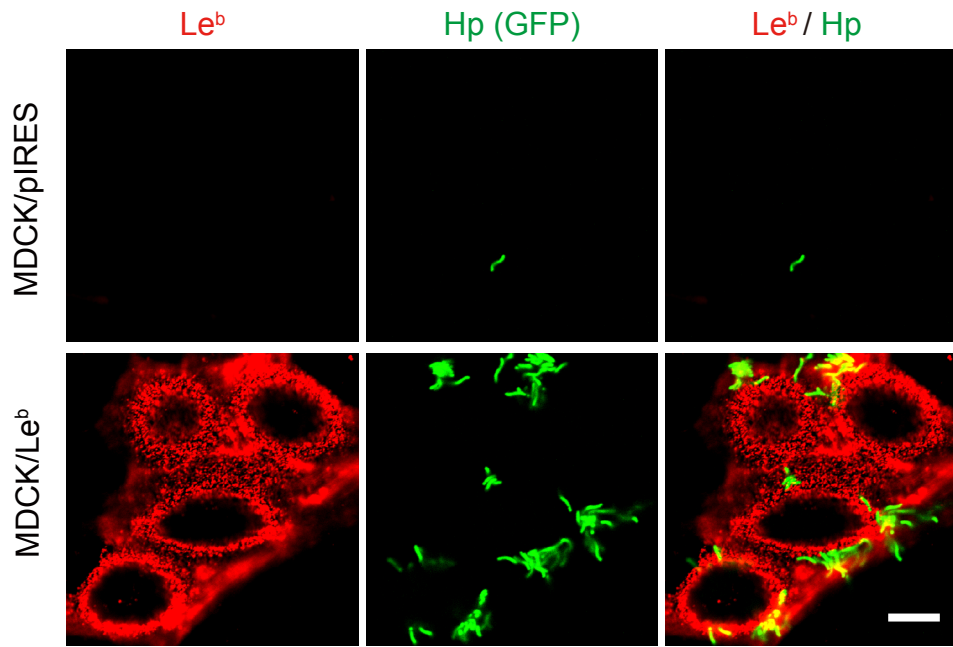

Figure S6

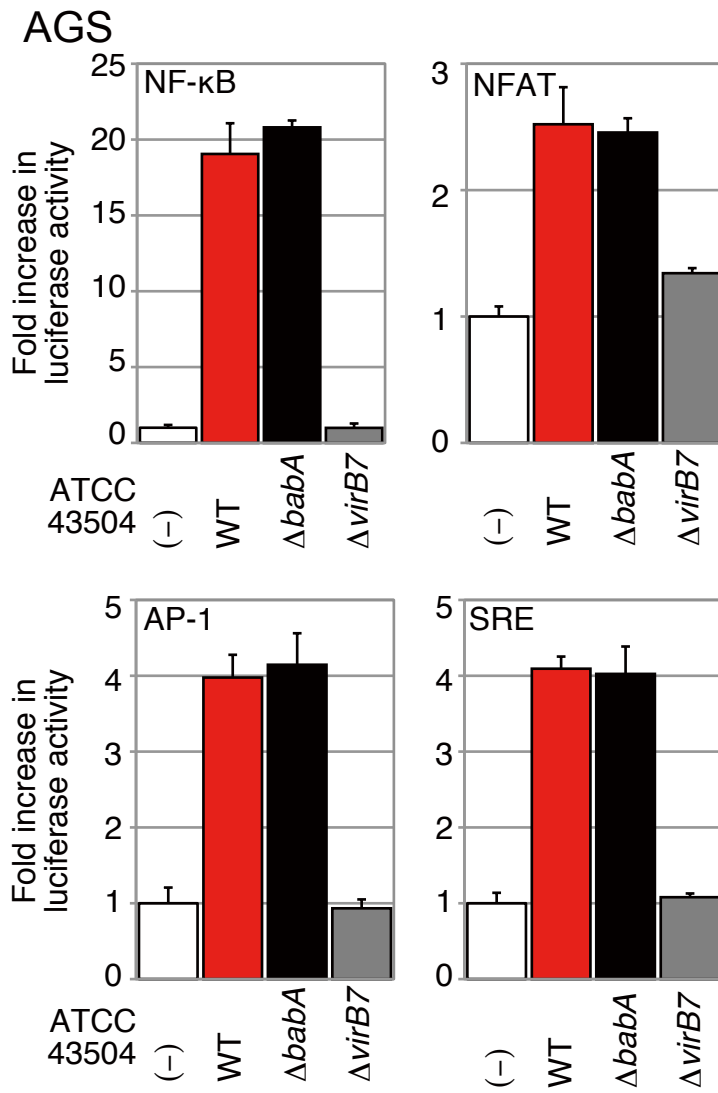

Figure S7

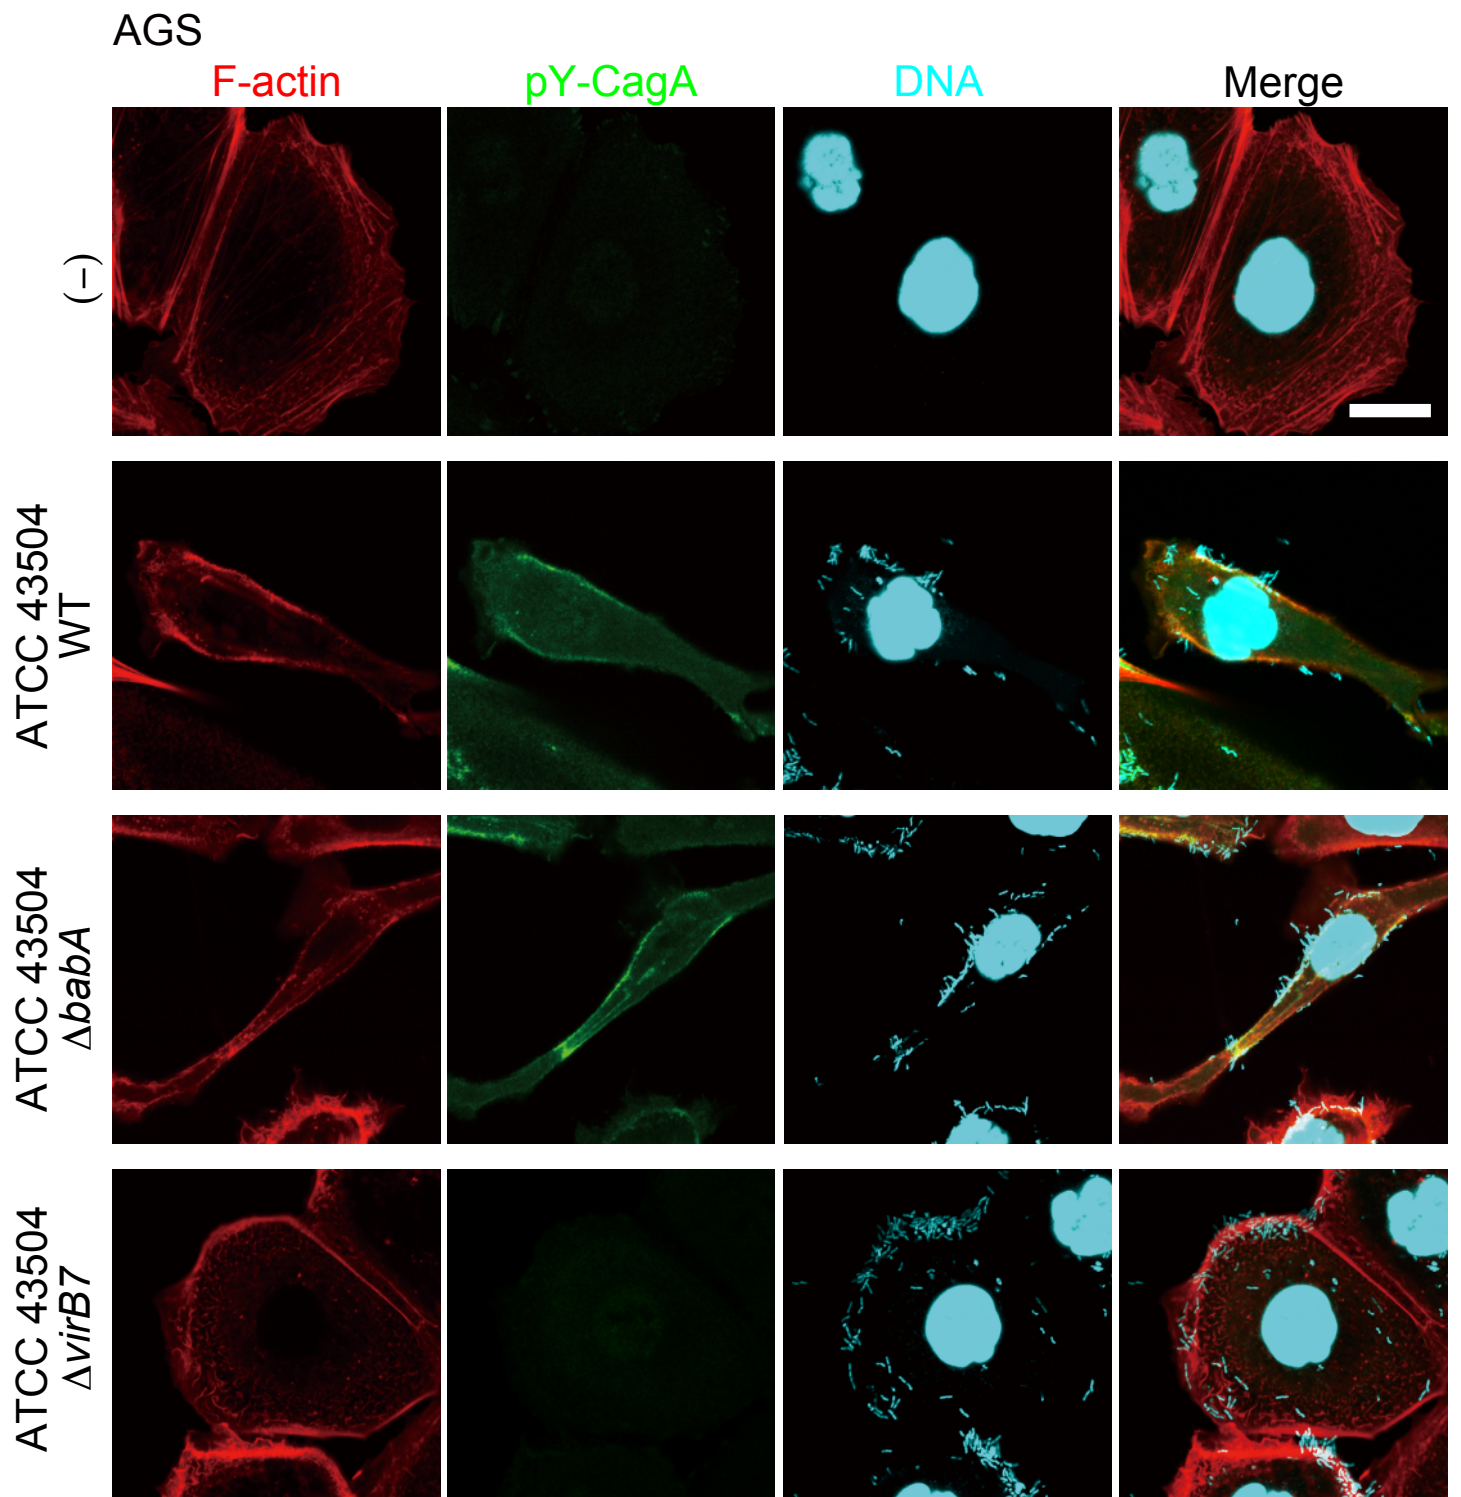

Figure S8
